# Supplementary material for: Repressor activity of the RpoS/σS-dependent RNA polymerase requires DNA binding
Source: PubMed Central journal article supplement — Nucleic Acids Res. 2015 Jan 10;43(3):1456–68. doi: 10.1093/nar/gku1379 (PMC4330354; doi:10.1093/nar/gku1379), 2015-01-10
Supplement: supp_gku1379_nar-03408-v-2014-File011.pdf [file supp_gku1379_nar-03408-v-2014-File011.pdf]

# **Repressor activity of the RpoS/ $\sigma^S$ -dependent RNA polymerase requires**

## **DNA binding**

**Corinne Lévi-Meyrueis<sup>1,2,3,§</sup>, Véronique Monteil<sup>1,2,§</sup>, Odile Sismeiro<sup>4</sup>, Marie-Agnès Dillies<sup>4</sup>, Annie Kolb<sup>1,2</sup>, Marc Monot<sup>5</sup>, Bruno Dupuy<sup>5</sup>, Sara Serradas Duarte<sup>1,2</sup>, Bernd Jagla<sup>4</sup>, Jean-Yves Coppée<sup>4</sup>, Mélanie Beraud<sup>1,2,6</sup> and Françoise Norel<sup>1,2,\*</sup>**

## **SUPPLEMENTARY DATA**

<sup>1</sup> Institut Pasteur, Laboratoire Systèmes Macromoléculaires et Signalisation, Département de Microbiologie, rue du Dr. Roux, 75015 Paris, France; <sup>2</sup> CNRS ERL3526, rue du Docteur Roux, 75015, Paris, France; <sup>3</sup> Université Paris Sud XI, 15, rue Georges Clémenceau, 91405 Orsay Cedex, France; <sup>4</sup> Institut Pasteur, Plate-forme Transcriptome et Epigénome, Département Génomes et génétique, rue du Dr. Roux, 75015 Paris, France; <sup>5</sup> Institut Pasteur, Laboratoire Pathogenèse des bactéries anaérobies, Département de Microbiologie, rue du Dr. Roux, 75015 Paris, France; <sup>6</sup> Université Paris Diderot, Sorbonne Paris Cité, Cellule Pasteur, Paris, rue du Dr. Roux, 75015, Paris, France

<sup>§</sup> The authors wish it to be known that, in their opinion, the first two authors should be regarded as joint First Authors.

\* To whom correspondence should be addressed. Tel: [(33) 140613122]; Fax: [(33) 145688960]; Email: [francoise.norel@pasteur.fr]

**Table S1: Bacterial strains and plasmids used in this study**

| Strain or Plasmid | Characteristics                                                                                                                                                              | Source or reference              |
|-------------------|------------------------------------------------------------------------------------------------------------------------------------------------------------------------------|----------------------------------|
| JM109             | <i>E. coli</i> K-12, <i>recA1 supE44 endA1 hsdR17 gyrA96 relA1 thi</i> $\Delta$ ( <i>lac-proAB</i> ) F'( <i>traD36 proAB<sup>+</sup> lacI<sup>f</sup> lacZ</i> $\Delta$ M15) | (40)                             |
| ATCC14028         | <i>Salmonella enterica</i> serovar Typhimurium, wild-type strain                                                                                                             | American Type Culture Collection |
| VF7928            | ATCC14028 $\Delta$ <i>rpoS</i> ::Cm                                                                                                                                          | (8)                              |
| VF8158            | VF7928 with the Cm cassette eliminated                                                                                                                                       | (8)                              |
| VFC326            | ATCC14028 $\Delta$ <i>rpoS</i> :: <i>tetRA</i>                                                                                                                               | (12)                             |
| VFC331            | ATCC14028 $\Delta$ <i>rpoS</i> (scarless in frame deletion of <i>rpoS</i> )                                                                                                  | (12)                             |
| VFC391            | ATCC14028 <i>rpoS</i> <sub>db</sub>                                                                                                                                          | This study                       |
| VF9579            | ATCC14028 <i>rpoS</i> <sub>420</sub> ::Cm                                                                                                                                    | This study                       |
| VF8293            | ATCC14028 $\Delta$ <i>rssB</i> ::Cm                                                                                                                                          | This study                       |
| VFC117            | ATCC14028 $\Delta$ <i>ompD</i> ::Cm                                                                                                                                          | This study                       |
| VFC781            | ATCC14028 $\Delta$ <i>ynfM</i> ::Cm                                                                                                                                          | This study                       |
| VF8132            | ATCC14028 <i>katE-lacZ</i>                                                                                                                                                   | (16)                             |
| VF8721            | ATCC14028 <i>katN-lacZ</i>                                                                                                                                                   | (16)                             |
| VF9583            | ATCC14028 <i>sdhA-lacZY</i> -Cm                                                                                                                                              | (16)                             |
| VFC165            | ATCC14028 <i>ompD-lacZY</i> -Km                                                                                                                                              | This study                       |
| VFC360            | ATCC14028 <i>ompD-lacZY</i> -Cm                                                                                                                                              | This study                       |
| VFC789            | ATCC14028 <i>ynfM-lacZY</i> -Km                                                                                                                                              | This study                       |
| VFD33             | ATCC14028 <i>ynfM-lacZY</i> -Cm                                                                                                                                              | This study                       |
| VF7969            | ATCC14028 $\Delta$ STM2922::Km                                                                                                                                               | (16)                             |
| VF7975            | ATCC14028 $\Delta$ STM2922::Km $\Delta$ <i>rpoS</i> ::Cm                                                                                                                     | (16)                             |
| VF9356            | VF7975 with the Cm cassette eliminated                                                                                                                                       | (16)                             |
| VF9682            | ATCC14028 $\Delta$ STM2922::Km <i>rpoS</i> <sub>R141S</sub>                                                                                                                  | This study                       |
| VF9676            | ATCC14028 $\Delta$ STM2922::Km <i>rpoS</i> <sub>A157T</sub>                                                                                                                  | This study                       |
| VF9849            | ATCC14028 $\Delta$ STM2922::Km <i>rpoS</i> <sub>db</sub>                                                                                                                     | This study                       |
| VF8082            | VF7969 <i>katE-lacZ</i>                                                                                                                                                      | (16)                             |
| VFD86             | VF9356 <i>katE-lacZ</i>                                                                                                                                                      | This study                       |
| VF9879            | VF9849 <i>katE-lacZ</i>                                                                                                                                                      | This study                       |
| VF8088            | VF7969 <i>katN-lacZ</i>                                                                                                                                                      | (16)                             |
| VF8089            | VF7975 <i>katN-lacZ</i>                                                                                                                                                      | (16)                             |
| VFD85             | VF9356 <i>katN-lacZ</i>                                                                                                                                                      | This study                       |
| VF9721            | VF9682 <i>katN-lacZ</i>                                                                                                                                                      | This study                       |
| VF9717            | VF9676 <i>katN-lacZ</i>                                                                                                                                                      | This study                       |
| VF9885            | VF9849 <i>katN-lacZ</i>                                                                                                                                                      | This study                       |
| VF9613            | VF9356 <i>sdhA-lacZY</i> -Cm                                                                                                                                                 | This study                       |
| VF9891            | VF9849 <i>sdhA-lacZY</i> -Cm                                                                                                                                                 | This study                       |
| VFC384            | VF7969 <i>ompD-lacZY</i> -Cm                                                                                                                                                 | This study                       |
| VFC385            | VF9356 <i>ompD-lacZY</i> -Cm                                                                                                                                                 | This study                       |
| VFC388            | VF9849 <i>ompD-lacZY</i> -Cm                                                                                                                                                 | This study                       |
| VFD35             | VF7969 <i>ynfM-lacZY</i> -Cm                                                                                                                                                 | This study                       |
| VFD36             | VF9356 <i>ynfM-lacZY</i> -Cm                                                                                                                                                 | This study                       |
| VFD37             | VF9849 <i>ynfM-lacZY</i> -Cm                                                                                                                                                 | This study                       |
| VFC802            | ATCC14028 <i>ynfM-lacZY</i> -Km                                                                                                                                              | This study                       |
| VFC803            | VFC331 <i>ynfM-lacZY</i> -Km                                                                                                                                                 | This study                       |
| VFC804            | VFC391 <i>ynfM-lacZY</i> -Km                                                                                                                                                 | This study                       |
| VFC259            | VF7969 $\Delta$ <i>ompD</i> ::Cm                                                                                                                                             | This study                       |
| VFC260            | VF9356 $\Delta$ <i>ompD</i> ::Cm                                                                                                                                             | This study                       |

|                                    |                                                                |                                |
|------------------------------------|----------------------------------------------------------------|--------------------------------|
| VFC261                             | VF9849 $\Delta ompD::Cm$                                       | This study                     |
| VFC314                             | ATCC14028 <i>sdh</i> -mut1                                     | This study                     |
| VFC315                             | VF8158 <i>sdh</i> -mut1                                        | This study                     |
| VFD984                             | ATCC14028 <i>sdh</i> -mut2                                     | This study                     |
| VFD987                             | VF8158 <i>sdh</i> -mut2                                        | This study                     |
| MA10200                            | LT2 $\Delta Gifsy-1 \Delta isrE::aadA \Delta rylB::cat$        | N. Figueroa-Bossi <sup>a</sup> |
| VFB867                             | ATCC14028 $\Delta isrE::aadA \Delta rylB::cat$                 | This study                     |
| VFB868                             | VF8158 $\Delta isrE::aadA \Delta rylB::cat$                    | This study                     |
| <b>Plasmids</b>                    |                                                                |                                |
| pACYC184                           | cloning vector, Cm <sup>R</sup> , Tet <sup>R</sup>             | (68)                           |
| pSTK4                              | <i>rpoS</i> cloned into pACYC184, Cm <sup>R</sup>              | (69)                           |
| pQE30                              | vector for expression of His-tagged proteins, Cb <sup>R</sup>  | Qiagen                         |
| pQE30 <i>rpoS</i>                  | Expresses His <sub>6</sub> - $\sigma^S$                        | (70)                           |
| pQE30 <i>rpoS</i> <sub>R141S</sub> | Expresses His <sub>6</sub> - $\sigma^S$ <sub>R141S</sub>       | This study                     |
| pQE30 <i>rpoS</i> <sub>A157T</sub> | Expresses His <sub>6</sub> - $\sigma^S$ <sub>A157T</sub>       | This study                     |
| pQE30 <i>rpoS</i> <sub>db</sub>    | Expresses His <sub>6</sub> - $\sigma^S$ <sub>db</sub>          | This study                     |
| pUCC52-2922K                       | <i>rpoS</i> and downstream sequences in pUC19, Cb <sup>R</sup> | (16)                           |
| pVF9551                            | pUCC52-2922K with mutation <i>rpoS</i> <sub>A157T</sub>        | This study                     |
| pVF9647                            | pUCC52-2922K with mutation <i>rpoS</i> <sub>R141S</sub>        | This study                     |
| pVF9793                            | pUCC52-2922K with mutation <i>rpoS</i> <sub>db</sub>           | This study                     |

<sup>a</sup> Albontin, Bossi, Figueroa-Bossi, manuscript in preparation (RyhB and IsrE are also named RyhB1 and RyhB2,

respectively (12, 63))

**Table S2. Oligonucleotides used in this study.**

| Name                            | Sequence (5' – 3')                                                     | Purpose                                         |
|---------------------------------|------------------------------------------------------------------------|-------------------------------------------------|
| <i>ompD</i> -P1                 | GAGGAAACACGCTAAGAAAATTATAAGGATTATTA<br>TGAAAGTGTAGGCTGGAGCTGCTTC       | Construction of $\Delta ompD::Cm$               |
| <i>ompD</i> -P2                 | CATCAAGAGAAAAAGCCAGCCCTGAAAGGACTGGCTTT<br>GTATTCAGCATATGAATATCCTCCTTAG | Construction of $\Delta ompD::Cm$               |
| <i>rssB</i> -P1                 | GCCACTATTGATTAAAGCCAGTCAGGGGAGAGAACATG<br>ACGCAGTGTAGGCTGGAGCTGCTTC    | Construction of $\Delta rssB::Cm$               |
| <i>rssB</i> -P2                 | CGGTAAAGCAATTTCCGCTCACTCTTCCGTTTGGTCATTC<br>CGCCATATGAATATCCTCCTTAG    | Construction of $\Delta rssB::Cm$               |
| <i>ynfM</i> -P1                 | GTCTCCTGTTGACGGAGATGTAAAGCAAGGATTTAACGT<br>GGTGTAGGCTGGAGCTGCTTC       | Construction of $\Delta ynfM::Cm$               |
| <i>ynfM</i> -P2                 | GCGATAGCGCACGTTGTCTATCGCCGGATTATTTCTTTCA<br>CATATGAATATCCTCCTTAG       | Construction of $\Delta ynfM::Cm$               |
| <i>sdhdel1</i> -TetFw           | AAACTATATGTAGGTTAATTGTAATGATTTTGTGAACGTC<br>TTAAGACCCACTTTCACATT       | Construction of <i>sdh</i> -mut1/mut2           |
| <i>sdhdel1</i> -TetRv           | TGGGTGGCTCGGGATTGCAGGGTATTCCGGAGACCTGGC<br>GGCCTAAGCACTTGICTCTCTG      | Construction of <i>sdh</i> -mut1/mut2           |
| <i>sdhmut2</i> -Fw              | GACAACTATATGTAGGTTAATTGTAATGATTTTGTGAA<br>CGTCTATACTTAAGCCAGGT         | Construction of <i>sdh</i> -mut2                |
| <i>sdhmut2</i> -Rv              | CGCTGGGTGGCTCGGGATTGCAGGGTATTCCGGAGACCT<br>GGCTTAAGTATAGGACGTTCA       | Construction of <i>sdh</i> -mut2                |
| <i>sdhmut1</i> -Fw              | GACAACTATATGTAGGTTAATTGTAATGATTTTGTGAA<br>CGTCCACTACGGCCGCCAGGT        | Construction of <i>sdh</i> -mut1                |
| <i>sdhmut1</i> -Rv              | CGCTGGGTGGCTCGGGATTGCAGGGTATTCCGGAGACCT<br>GGCGGCCGTAGTGGACGTTCA       | Construction of <i>sdh</i> -mut1                |
| <i>rpoS</i> <sub>420</sub> -P1  | GCTTATCCGTGACGTCGAGAAGTTGACCCGGAACGCGG<br>GTTCGTGTAGGCTGGAGCTGCTTC     | Construction of <i>rpoS</i> <sub>420</sub> ::Cm |
| <i>rpoS</i> <sub>420</sub> -P2b | GATGCACATATTGAACCTCATGGCGACTTCGCCGGTAAAA<br>GGAGCATATGAATATCCTCCTTAG   | Construction of <i>rpoS</i> <sub>420</sub> ::Cm |
| HK1                             | AGGCTCGGATCCATGAGTCAGAATACGCTGAAAGTTCAT                                | Cloning of <i>rpoS</i> in pQE30                 |
| HK2                             | TTCCGAAAGCTTTTACTCGCGAACAGCGCTTCGATATT                                 | Cloning of <i>rpoS</i> in pQE30                 |
| G469Af                          | CGCCAGACAATCGAACGGACGATCATGAACCAAACC                                   | Site-directed mutagenesis of <i>rpoS</i>        |
| G469Ar                          | GGTTTGGTTCATGATCGTCCGTTTCGATTGTCTGGCG                                  | Site-directed mutagenesis of <i>rpoS</i>        |
| C421Af                          | CCGGAACGCGGGTTCAGCTTCTCAACATACGCAACC                                   | Site-directed mutagenesis of <i>rpoS</i>        |
| C421Ar                          | GGTTGCGTATGTTGAGAAGCTGAACCCGCTTCCGG                                    | Site-directed mutagenesis of <i>rpoS</i>        |
| CL- <i>sdhA</i> -Fw             | CTACCGTTCCTCCGCTCTT                                                    | Quantitative real-time PCR                      |
| CL- <i>sdhA</i> -Rv             | GAAAATCGTGGTGTGGTTT                                                    | Quantitative real-time PCR                      |
| CL- <i>sdhB</i> -Fw             | GAATAATGGGCAAAATCCAC                                                   | Quantitative real-time PCR                      |
| CL- <i>sdhB</i> -Rv             | TAAACTTATCCGGTTCCA                                                     | Quantitative real-time PCR                      |
| CL- <i>sdhC</i> -Fw             | CACCAGCCTCTCTCTCC                                                      | Quantitative real-time PCR                      |
| CL- <i>sdhC</i> -Rv             | TTCCAGATAGCCAAAATCC                                                    | Quantitative real-time PCR                      |
| CL- <i>sdhD</i> -Fw             | TTCTTCTCATCGGCCTTC                                                     | Quantitative real-time PCR                      |
| CL- <i>sdhD</i> -Rv             | CCCACACCACAACAATC                                                      | Quantitative real-time PCR                      |
| CL- <i>rpoZ</i> -Fw             | GACGCTGTAGAGAAAATTGG                                                   | Quantitative real-time PCR                      |
| CL- <i>rpoZ</i> -Rv             | CGTCGAGGATCTGGTTGT                                                     | Quantitative real-time PCR                      |

## Supplementary References

68. Chang, A.C. and Cohen, S.N. (1978) Construction and characterization of amplifiable multicopy DNA cloning vehicles derived from the P15A cryptic miniplasmid. *J. Bacteriol.*, **134**, 1141-1156.
69. Kowarz, L., Coynault, C., Robbe-Saule, V. and Norel, F. (1994) The *Salmonella typhimurium katF (rpoS)* gene: cloning, nucleotide sequence, and regulation of *spvR* and *spvABCD* virulence plasmid genes. *J. Bacteriol.*, **176**, 6852-6860.
70. Monteil, V., Kolb, A., D'Alayer, J., Beguin, P. and Norel, F. (2010) Identification of conserved amino acid residues of the *Salmonella* sigmaS chaperone Crl involved in Crl-sigmaS interactions. *J. Bacteriol.*, **192**, 1075-1087.
71. Thompson, J.D., Higgins, D.G. and Gibson, T.J. (1994) CLUSTAL W: improving the sensitivity of progressive multiple sequence alignment through sequence weighting, positions-specific gap penalties and weight matrix choice. *Nucleic Acids Res.*, **22**, 4673-4680.

## SUPPLEMENTARY FIGURES

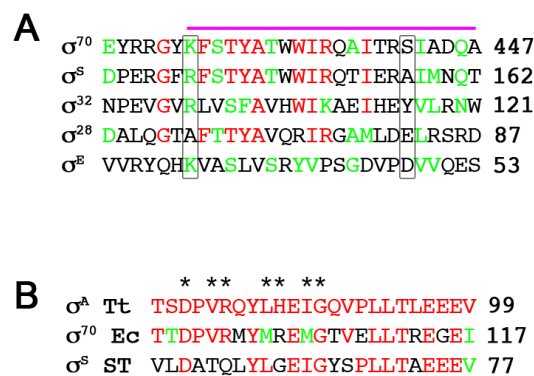

**Figure S1. Amino acid sequence comparison between DNA-binding regions of  $\sigma^S$  and other sigma factors.** (A) Sequence alignment of *S. Typhimurium*  $\sigma^S$ ,  $\sigma^{70}$ ,  $\sigma^{32}$ ,  $\sigma^{28}$  and  $\sigma^E$  in the region containing the amino-acid substitutions in  $\sigma^{S_{db}}$  (R141 and A157 are shown in boxes). The bar in magenta corresponds to a DNA-binding  $\alpha$  helix in housekeeping sigma factors (57). (B) Sequences of sigma factor region 1.2 (Figure 2A) in  $\sigma^S$  and housekeeping sigma factors ( $\sigma^{70}$  and  $\sigma^A$ ).  $\sigma^A$  is from *Thermus thermophilus* (Tt),  $\sigma^{70}$  from *E. coli* (Ec) and  $\sigma^S$  from *Salmonella Typhimurium* (ST). \* denotes interactions between  $\sigma$  region 1.2 of housekeeping RNAP and non template-strand ssDNA of discriminator element (GGG) (57). The alignments were generated with ClustalW (71).

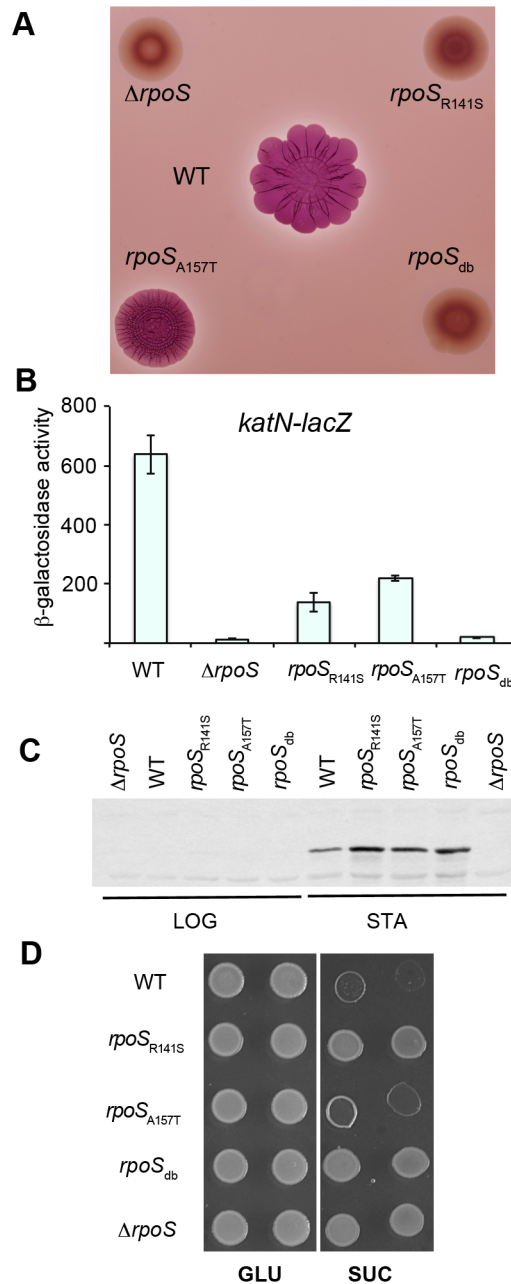

**Figure S2. Physiological characterization of *Salmonella rpoS* mutants.** Expression of the rdar morphotype (A) and of a *katN-lacZ* transcriptional fusion (B) in the *Salmonella* wild-type strain VF7969 and its *rpoS* mutant derivatives VF9356, VF9682, VF9676 and VF9849 (Table S1).  $\beta$ -galactosidase activity was measured in cultures grown for 18h in LB at 37°C. All results are shown as the mean and standard deviation of at least three independent experiments. (C) Cellular  $\sigma^S$  levels immunodetected with anti- $\sigma^S$  antibodies, in exponential (LOG, OD<sub>600</sub> of 0.4) and stationary (STA, OD<sub>600</sub> of 4) phase cultures of *Salmonella* strains expressing either wild-type  $\sigma^S$  (VF7969) or its variants (VF9356, VF9682, VF9676, and VF9849, Table S1). Ten micrograms of total protein were loaded into each slot. Similar results were obtained in repeat experiments. (D) Ability of the wild-type strain and  $\Delta rpoS$  mutants to grow at the expense of glucose (GLU) and succinate (SUC) as a sole carbon source (5  $\mu$ l of cultures diluted to OD<sub>600</sub> of 1.0 and 0.05 were spotted).

*sraL* CGCTGGCGAACAGGGCGTCGTCGCT**TACACT**TACA  
*yahO* ACTGGATTTTTCCAGCAATCTAC**ACTATT**TTTA  
*ybgS* ATGTAGCGAAAAATGGGATCTAAT**CTACACT**TTTT  
*yeaG* ACAGGCAAGTTTTGCAAAATGCCAT**CTACGCT**TAAT  
*osmC* GACAACGCAGATTAGCAGCATGGT**CTATACT**TTTAT  
*otsBA* AAATGGCGAGCAGCGTCACACTGT**CTATACT**TACA  
*yohC* TTCATAAAATAACCAGAAACTGAAT**TATACT**TGAA  
*ygdI* TCCTGGCGAATTATGTAAAGGAGGT**TATGCT**TGAAT  
*yghA* TCCCTCTTACGGTAGTAAAAGTGT**CTACGCT**TAAA  
*oat* GGCTTAGACCCCGCTAATCCCTG**CAATACT**TAAT  
*yjbJ* TAAAACCGAAGCCGAATTCCTGC**CTACAAT**TATT  
*ecnB* GCCCATCATTTTCTGGGATGTTGT**CTATTAT**TAAAG  
*osmY* GACAAGCGATTTTAAAATTGTGAT**CTATAAT**TAAAC

**Figure S3. Promoter sequences of  $\sigma^S$ -regulated genes in Table 1 used to construct the logograph on Figure 7A.** Promoter sequences are from (24, 62, 63). The -10 region is shown in bold face.



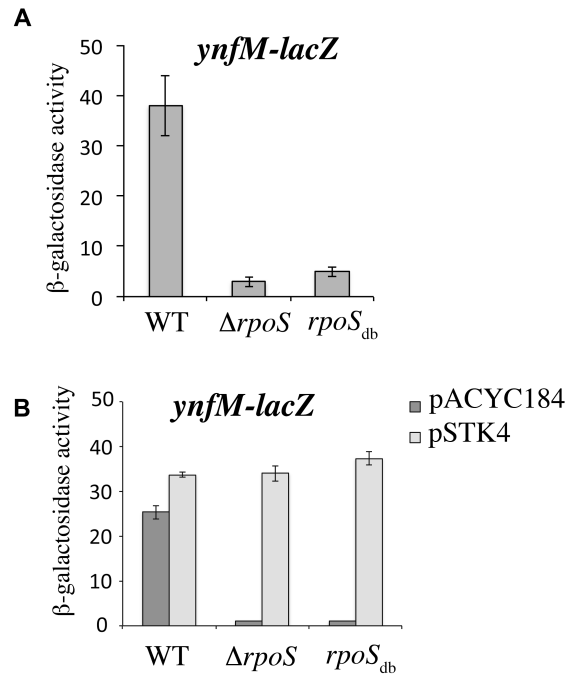

**Figure S4. Expression of a *ynfM-lacZ* transcriptional fusion.** (A) Expression of a transcriptional *ynfM-lacZ* fusion in the wild-type (WT) strain VF7969, and its *rpoS* derivatives VF9356 and VF9849, grown for 18h in LB at 37°C. (B) Plasmid pSTK4 carrying the *rpoS* gene and the empty vector pACYC184 were used in complementation experiments for *ynfM-lacZ* expression in strains ATCC14028, VFC331 and VFC391 (Table S1). Results shown are the mean and standard deviation of at least three independent experiments.

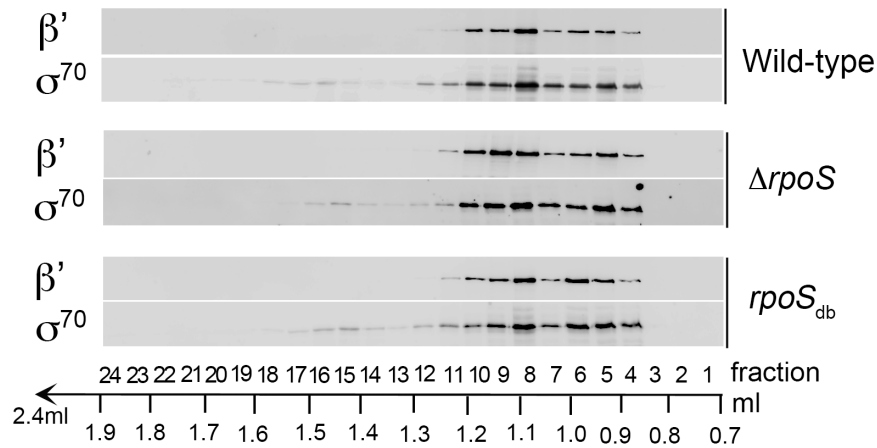

**Figure S5. Distribution of free and holoenzyme forms of  $\sigma^{70}$  in the wild-type strain and the  $\Delta rpoS$  and  $rpoS_{db}$  mutants.** Whole cell lysates from wild-type strain VF7969, the  $\Delta rpoS$  mutant (VF9356) and the  $rpoS_{db}$  mutant (VF9849) were fractionated by size exclusion chromatography and the relative concentration of RNAP subunits was subsequently analyzed in the fractions by immunoblot using monoclonal antibodies against the  $\beta'$  subunit of RNA polymerase and a monoclonal anti- $\sigma^{70}$  antibody (Neoclone CP004). The elution profiles were similar for the wild-type,  $\Delta rpoS$  and  $rpoS_{db}$  strains. Two populations of  $\sigma^{70}$  were found. The major one co-eluted with the  $\beta'$  subunit of core RNAP and was interpreted to represent holoenzyme-associated  $\sigma^{70}$  (in fractions 4-11), while the other, in fractions 14-17, represented free (unbound)  $\sigma^{70}$ . The percentage of total  $\sigma^{70}$  in fractions corresponding to free  $\sigma^{70}$  was very low for the three strains suggesting that most  $\sigma^{70}$  molecules were associated with RNAP in stationary phase. Two independent experiments were performed with similar results ( $\sigma^{70}$  in fractions 4-11 represented 94 to 98 % of total  $\sigma^{70}$  for the three strains, calculated using the IMAGEJ software).
